# Supplementary material for: Influence of pH and organic ligands on the supramolecular network based on molybdenum phosphate/strontium chemistry
Source: Royal Society of Chemistry journal article supplement (doi:10.1039/c2dt30393k), 2012-01-01
Supplement: c2dt30393k.pdf [file c2dt30393k.pdf]

## Supporting information

# Influence of pH and organic ligand on the supramolecular network based on molybdenum phosphate/ strontium chemistry

Kai Yu, Bai-Bin Zhou,\* Yang Yu, Zhan-Hua Su, Hai-yan Wang, Chun-mei Wang, and Chun-xiao Wang

### 1. Structural figures

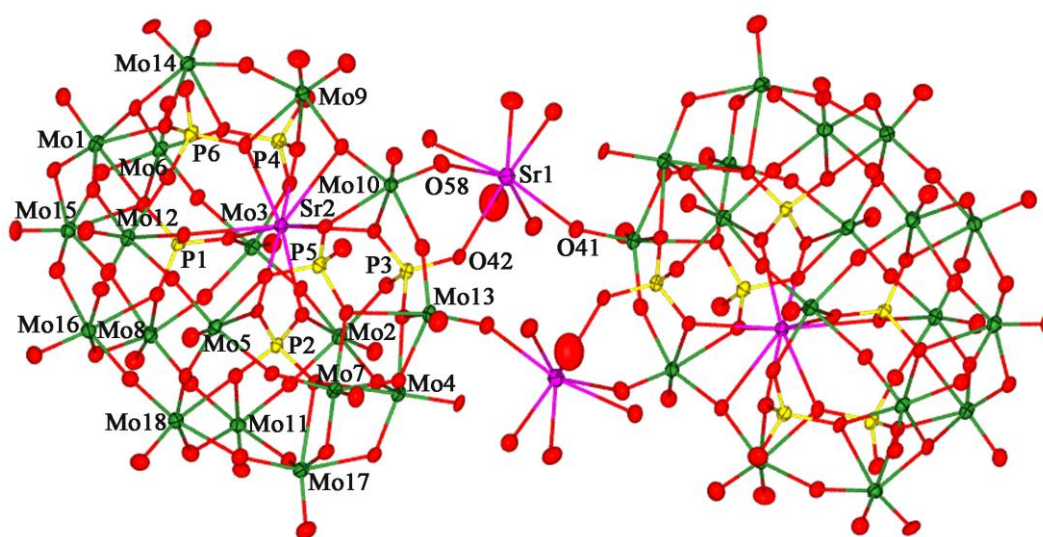

Fig. S1 ORTEP view of the basic units in compound 1 with 50% thermal ellipsoids.

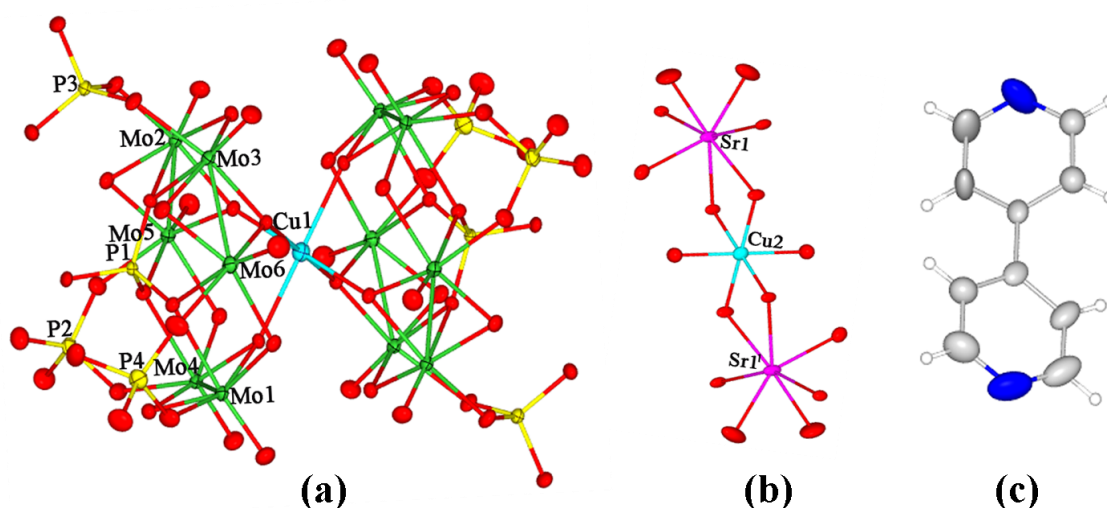

Fig. S2 ORTEP view of the basic units in compound 2 with 50% thermal ellipsoids: (a) the sandwich-type  $\{\text{Cu}(\text{P}_4\text{Mo}_6)_2\}$  unit; (b) the trinuclear  $\{\text{Sr}_2\text{Cu}\}$  linker; (c) the bpy ligand.

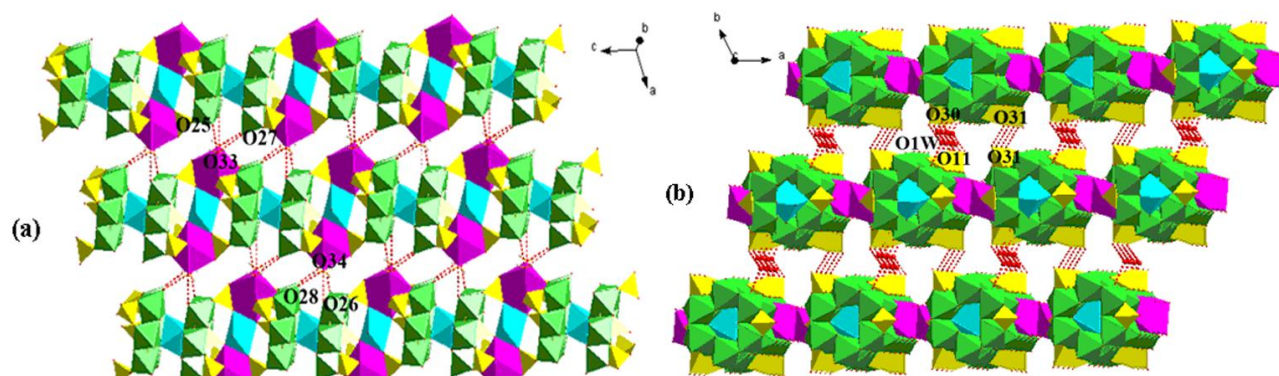

**Figure S3** (a) The 2D supramolecular sheet of **2** along the *b* axis. (b) The 3D supramolecular framework along the *c* axis of **2**. The broken lines represent the hydrogen bonding interactions. Other isolated organic ligands and water molecules are omitted for clarity.

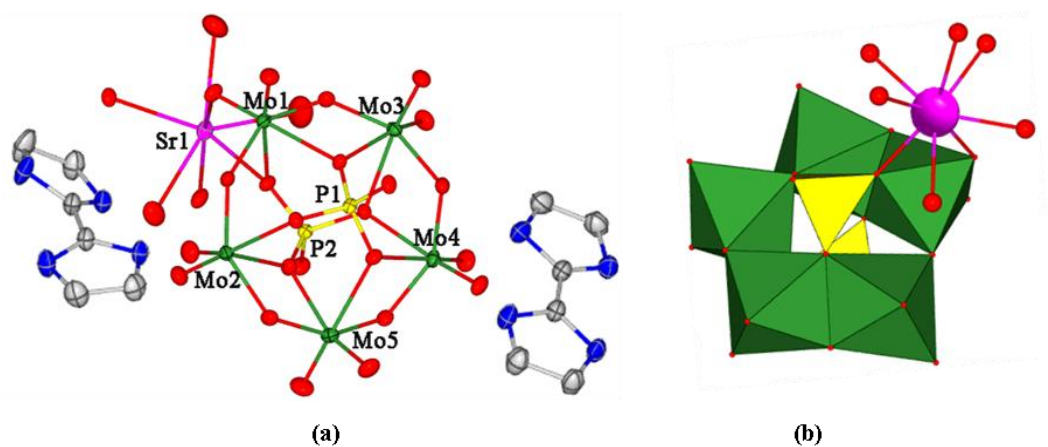

**Fig. S4** (a) ORTEP view of the basic units in compound **3** with 50% thermal ellipsoids; (b) the Polyhedral representation of the  $[\text{Mo}_5\text{P}_2]$  cluster.

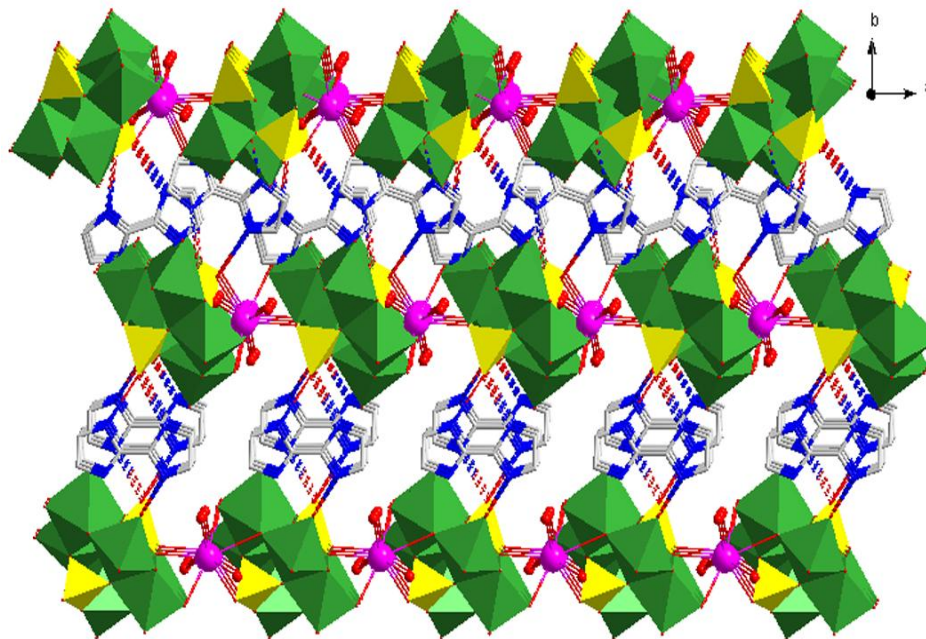

**Figure S5** (b) The 3D supramolecular framework along the *c* axis of **3**. The broken lines represent the hydrogen bonding interactions. Other isolated organic ligands and water molecules are omitted for clarity.

## 2. Structural data

**Table S1** Selected bond lengths (Å) and bond angles (°) of compound **1**

|                   |           |                          |           |                    |           |
|-------------------|-----------|--------------------------|-----------|--------------------|-----------|
| Mo(1)-O(54)       | 1.674(8)  | Mo(3)-O(67)              | 1.670(9)  | Mo(5)-O(46)        | 1.687(8)  |
| Mo(1)-O(11)       | 1.787(8)  | Mo(3)-O(1)               | 1.871(8)  | Mo(5)-O(4)         | 1.868(8)  |
| Mo(1)-O(51)       | 1.805(8)  | Mo(3)-O(15)              | 1.890(8)  | Mo(5)-O(22)        | 1.877(8)  |
| Mo(1)-O(20)       | 2.057(8)  | Mo(3)-O(37)              | 2.045(8)  | Mo(5)-O(17)        | 2.037(8)  |
| Mo(1)-O(38)       | 2.132(8)  | Mo(3)-O(56)              | 2.071(8)  | Mo(5)-O(29)        | 2.077(8)  |
| Mo(1)-O(2)        | 2.431(8)  | Mo(3)-O(18)              | 2.193(8)  | Mo(5)-O(6)         | 2.216(8)  |
| Mo(2)-O(55)       | 1.692(8)  | Mo(4)-O(19)              | 1.693(7)  | Mo(6)-O(25)        | 1.699(8)  |
| Mo(2)-O(1)        | 1.859(8)  | Mo(4)-O(34)              | 1.951(3)  | Mo(6)-O(68)        | 1.780(8)  |
| Mo(2)-O(35)       | 1.781(8)  | Mo(4)-O(60) <sup>*</sup> | 1.808(8)  | Mo(6)-O(37)        | 1.782(8)  |
| Mo(2)-O(27)       | 2.039(8)  | Mo(4)-O(13)              | 2.049(8)  | Mo(6)-O(20)        | 2.045(8)  |
| Mo(2)-O(34)       | 2.043(8)  | Mo(4)-O(32)              | 2.114(8)  | Mo(6)-O(36)        | 2.153(8)  |
| Mo(2)-O(14)       | 2.219(8)  | Mo(4)-O(21)              | 2.410(8)  | Mo(6)-O(2)         | 2.373(8)  |
| Mo(7)-O(62)       | 1.674(8)  | Mo(9)-O(70)              | 1.692(8)  | Mo(11)-O(59)       | 1.700(8)  |
| Mo(7)-O(17)       | 1.792(8)  | Mo(9)-O(72)              | 1.711(9)  | Mo(11)-O(35)       | 1.879(8)  |
| Mo(7)-O(40)       | 1.802(8)  | Mo(9)-O(8)               | 1.923(8)  | Mo(11)-O(5)        | 1.889(8)  |
| Mo(7)-O(13)       | 2.037(8)  | Mo(9)-O(39)              | 1.967(8)  | Mo(11)-O(45)       | 1.942(9)  |
| Mo(7)-O(33)       | 2.142(8)  | Mo(9)-O(9)               | 2.233(8)  | Mo(11)-O(47)       | 2.094(8)  |
| Mo(7)-O(21)       | 2.414(8)  | Mo(9)-O(7)               | 2.278(8)  | Mo(11)-O(16)       | 2.313(8)  |
| Mo(8)-O(74)       | 1.686(8)  | Mo(10)-O(58)             | 1.695(8)  | Mo(12)-O(69)       | 1.686(9)  |
| Mo(8)-O(5)        | 1.873(8)  | Mo(10)-O(30)             | 1.705(8)  | Mo(12)-O(4)        | 1.877(8)  |
| Mo(8)-O(15)       | 1.882(8)  | Mo(10)-O(8)              | 1.890(8)  | Mo(12)-O(26)       | 1.878(8)  |
| Mo(8)-O(43)       | 1.913(8)  | Mo(10)-O(44)             | 2.005(8)  | Mo(12)-O(11)       | 2.024(8)  |
| Mo(8)-O(24)       | 2.093(8)  | Mo(10)-O(12)             | 2.224(8)  | Mo(12)-O(28)       | 2.046(8)  |
| Mo(8)-O(3)        | 2.288(8)  | Mo(10)-O(23)             | 2.267(8)  | Mo(12)-O(31)       | 2.218(8)  |
| Mo(13)-O(49)      | 1.703(9)  | Mo(15)-O(65)             | 1.694(8)  | Mo(17)-O(48)       | 1.663(9)  |
| Mo(13)-O(41)      | 1.735(8)  | Mo(15)-O(53)             | 1.801(9)  | Mo(17)-O(57)       | 1.805(8)  |
| Mo(13)-O(44)      | 1.826(8)  | Mo(15)-O(24)             | 1.808(8)  | Mo(17)-O(47)       | 1.814(8)  |
| Mo(13)-O(13)      | 2.052(8)  | Mo(15)-O(51)             | 2.051(8)  | Mo(17)-O(40)       | 2.073(8)  |
| Mo(13)-O(33)      | 2.306(8)  | Mo(15)-O(68)             | 2.122(9)  | Mo(17)-O(60)       | 2.074(8)  |
| Mo(13)-O(32)      | 2.343(8)  | Mo(15)-O(2)              | 2.423(8)  | Mo(17)-O(21)       | 2.429(8)  |
| Mo(14)-O(52)      | 1.690(8)  | Mo(16)-O(73)             | 1.670(9)  | Mo(18)-O(61)       | 1.658(9)  |
| Mo(14)-O(63)      | 1.715(9)  | Mo(16)-O(10)             | 1.872(8)  | Mo(18)-O(10)       | 1.874(8)  |
| Mo(14)-O(39)      | 1.852(8)  | Mo(16)-O(26)             | 1.882(8)  | Mo(18)-O(22)       | 1.885(8)  |
| Mo(14)-O(20)      | 2.042(8)  | Mo(16)-O(43)             | 1.954(8)  | Mo(18)-O(45)       | 1.957(8)  |
| Mo(14)-O(38)      | 2.345(8)  | Mo(16)-O(53)             | 2.100(8)  | Mo(18)-O(57)       | 2.123(8)  |
| Mo(14)-O(36)      | 2.366(8)  | Mo(16)-O(3)              | 2.308(8)  | Mo(18)-O(16)       | 2.282(8)  |
| Sr(1)-O(41)       | 2.545(8)  | Sr(1)-O(64)              | 2.603(9)  | Sr(1)-O(58)#1      | 2.665(9)  |
| Sr(1)-O(42)#1     | 2.554(8)  | Sr(1)-O(63)#2            | 2.620(9)  | Sr(1)-O(77)        | 2.694(12) |
| Sr(1)-O(75)       | 2.588(11) | Sr(1)-O(76)              | 2.660(12) | Sr(1)-O(19)        | 2.959(8)  |
| Sr(2)-O(23)       | 2.557(8)  | Sr(2)-O(12)              | 2.609(8)  | Sr(2)-O(14)        | 2.683(8)  |
| Sr(2)-O(9)        | 2.586(8)  | Sr(2)-O(6)               | 2.673(8)  | Sr(2)-O(18)        | 2.688(8)  |
| Sr(2)-O(7)        | 2.587(8)  | Sr(2)-O(31)              | 2.678(8)  | Sr(2)-O(8)         | 2.860(8)  |
| P(1)-O(31)        | 1.519(8)  | P(2)-O(14)               | 1.510(9)  | P(3)-O(42)         | 1.501(8)  |
| P(1)-O(18)        | 1.525(8)  | P(2)-O(6)                | 1.515(8)  | P(3)-O(23)         | 1.529(8)  |
| P(1)-O(3)         | 1.536(8)  | P(2)-O(16)               | 1.530(8)  | P(3)-O(27)         | 1.549(9)  |
| P(1)-O(2)         | 1.581(8)  | P(2)-O(21)               | 1.580(8)  | P(3)-O(32)         | 1.581(8)  |
| P(4)-O(7)         | 1.518(9)  | P(5)-O(12)               | 1.508(8)  | P(6)-O(50)         | 1.524(8)  |
| P(4)-O(56)        | 1.518(8)  | P(5)-O(71)               | 1.521(9)  | P(6)-O(28)         | 1.532(9)  |
| P(4)-O(66)        | 1.538(10) | P(5)-O(29)               | 1.536(8)  | P(6)-O(9)          | 1.533(8)  |
| P(4)-O(36)        | 1.550(8)  | P(5)-O(33)               | 1.574(8)  | P(6)-O(38)         | 1.571(9)  |
| O(54)-Mo(1)-O(11) | 104.9(4)  | O(62)-Mo(7)-O(17)        | 102.9(4)  | O(49)-Mo(13)-O(41) | 102.7(4)  |
| O(54)-Mo(1)-O(38) | 98.9(4)   | O(62)-Mo(7)-O(40)        | 103.5(4)  | O(49)-Mo(13)-O(44) | 104.0(4)  |
| O(54)-Mo(1)-O(51) | 101.2(4)  | O(62)-Mo(7)-O(13)        | 99.4(4)   | O(49)-Mo(13)-O(13) | 98.6(4)   |



|                     |          |                    |          |                     |          |
|---------------------|----------|--------------------|----------|---------------------|----------|
| O(54)-Mo(1)-O(20)   | 99.7(4)  | O(62)-Mo(7)-O(33)  | 97.1(4)  | O(49)-Mo(13)-O(33)  | 88.0(4)  |
| O(54)-Mo(1)-O(2)    | 170.3(4) | O(62)-Mo(7)-O(21)  | 172.0(3) | O(49)-Mo(13)-O(32)  | 166.4(4) |
| O(55)-Mo(2)-O(1)    | 98.9(4)  | O(74)-Mo(8)-O(5)   | 100.8(4) | O(52)-Mo(14)-O(63)  | 103.2(4) |
| O(55)-Mo(2)-O(35)   | 101.7(4) | O(74)-Mo(8)-O(15)  | 100.8(4) | O(52)-Mo(14)-O(39)  | 103.6(4) |
| O(55)-Mo(2)-O(27)   | 96.0(4)  | O(74)-Mo(8)-O(43)  | 100.9(4) | O(52)-Mo(14)-O(20)  | 99.1(4)  |
| O(55)-Mo(2)-O(34)   | 92.9(4)  | O(74)-Mo(8)-O(24)  | 93.5(4)  | O(52)-Mo(14)-O(38)  | 86.4(4)  |
| O(55)-Mo(2)-O(14)   | 172.9(3) | O(74)-Mo(8)-O(3)   | 169.5(4) | O(52)-Mo(14)-O(36)  | 166.0(4) |
| O(67)-Mo(3)-O(1)    | 98.8(4)  | O(70)-Mo(9)-O(72)  | 102.2(5) | O(65)-Mo(15)-O(53)  | 104.3(4) |
| O(67)-Mo(3)-O(15)   | 103.3(4) | O(70)-Mo(9)-O(8)   | 99.9(4)  | O(65)-Mo(15)-O(24)  | 104.5(4) |
| O(67)-Mo(3)-O(37)   | 92.9(4)  | O(70)-Mo(9)-O(39)  | 96.9(4)  | O(65)-Mo(15)-O(51)  | 97.4(4)  |
| O(67)-Mo(3)-O(56)   | 93.2(4)  | O(70)-Mo(9)-O(9)   | 92.4(4)  | O(65)-Mo(15)-O(68)  | 95.6(4)  |
| O(67)-Mo(3)-O(18)   | 170.0(4) | O(70)-Mo(9)-O(7)   | 168.7(4) | O(65)-Mo(15)-O(2)   | 163.1(4) |
| O(19)-Mo(4)-O(34)   | 102.9(4) | O(58)-Mo(10)-O(30) | 102.1(4) | O(73)-Mo(16)-O(10)  | 99.9(4)  |
| O(19)-Mo(4)-O(60)   | 103.3(4) | O(58)-Mo(10)-O(8)  | 101.3(4) | O(73)-Mo(16)-O(26)  | 102.6(4) |
| O(19)-Mo(4)-O(13)   | 99.4(4)  | O(58)-Mo(10)-O(44) | 94.5(4)  | O(73)-Mo(16)-O(43)  | 100.4(4) |
| O(19)-Mo(4)-O(32)   | 96.8(4)  | O(58)-Mo(10)-O(12) | 165.2(4) | O(73)-Mo(16)-O(53)  | 93.4(4)  |
| O(19)-Mo(4)-O(21)   | 171.8(3) | O(58)-Mo(10)-O(23) | 88.7(4)  | O(73)-Mo(16)-O(3)   | 169.4(4) |
| O(46)-Mo(5)-O(4)    | 99.2(4)  | O(59)-Mo(11)-O(35) | 101.0(4) | O(48)-Mo(17)-O(57)  | 104.3(4) |
| O(46)-Mo(5)-O(22)   | 102.7(4) | O(59)-Mo(11)-O(5)  | 100.6(4) | O(48)-Mo(17)-O(47)  | 103.1(4) |
| O(46)-Mo(5)-O(17)   | 92.0(4)  | O(59)-Mo(11)-O(45) | 100.7(4) | O(48)-Mo(17)-O(40)  | 98.2(4)  |
| O(46)-Mo(5)-O(29)   | 94.1(4)  | O(59)-Mo(11)-O(47) | 92.7(4)  | O(48)-Mo(17)-O(60)  | 97.3(4)  |
| O(46)-Mo(5)-O(6)    | 171.2(4) | O(59)-Mo(11)-O(16) | 169.3(4) | O(48)-Mo(17)-O(21)  | 164.7(4) |
| O(25)-Mo(6)-O(68)   | 102.1(4) | O(69)-Mo(12)-O(4)  | 99.2(4)  | O(61)-Mo(18)-O(10)  | 101.6(4) |
| O(25)-Mo(6)-O(37)   | 103.5(4) | O(69)-Mo(12)-O(26) | 102.1(4) | O(61)-Mo(18)-O(22)  | 101.9(4) |
| O(25)-Mo(6)-O(20)   | 98.4(4)  | O(69)-Mo(12)-O(11) | 93.1(4)  | O(61)-Mo(18)-O(45)  | 99.9(4)  |
| O(25)-Mo(6)-O(36)   | 95.3(4)  | O(69)-Mo(12)-O(28) | 95.5(4)  | O(61)-Mo(18)-O(57)  | 92.0(4)  |
| O(25)-Mo(6)-O(2)    | 171.7(3) | O(69)-Mo(12)-O(31) | 171.6(4) | O(61)-Mo(18)-O(16)  | 168.7(4) |
| O(41)-Sr(1)-O(42)#1 | 85.4(3)  | O(41)-Sr(1)-O(75)  | 128.5(3) | O(41)-Sr(1)-O(64)   | 77.4(3)  |
| O(41)-Sr(1)-O(63)#2 | 79.9(3)  | O(41)-Sr(1)-O(76)  | 136.4(3) | O(41)-Sr(1)-O(58)#1 | 146.3(3) |
| O(23)-Sr(2)-O(7)    | 81.3(3)  | O(23)-Sr(2)-O(12)  | 65.4(3)  | O(23)-Sr(2)-O(6)    | 102.4(2) |
| O(23)-Sr(2)-O(31)   | 169.9(2) | O(23)-Sr(2)-O(14)  | 73.7(2)  | O(23)-Sr(2)-O(18)   | 118.7(3) |
| O(23)-Sr(2)-O(8)    | 58.7(2)  | O(6)-Sr(2)-O(14)   | 54.3(2)  |                     |          |
| O(31)-P(1)-O(18)    | 108.3(4) | O(31)-P(1)-O(3)    | 111.6(5) | O(31)-P(1)-O(2)     | 109.6(4) |
| O(14)-P(2)-O(6)     | 107.7(4) | O(14)-P(2)-O(16)   | 111.5(5) | O(14)-P(2)-O(21)    | 110.1(4) |
| O(42)-P(3)-O(23)    | 113.2(5) | O(42)-P(3)-O(27)   | 109.7(5) | O(42)-P(3)-O(32)    | 109.1(5) |
| O(7)-P(4)-O(56)     | 111.3(5) | O(7)-P(4)-O(66)    | 111.5(5) | O(7)-P(4)-O(36)     | 109.6(5) |
| O(12)-P(5)-O(71)    | 110.8(5) | O(12)-P(5)-O(29)   | 110.4(5) | O(12)-P(5)-O(33)    | 108.3(5) |
| O(50)-P(6)-O(28)    | 108.0(5) | O(50)-P(6)-O(9)    | 111.3(5) | O(50)-P(6)-O(38)    | 110.3(5) |

Symmetry transformations used to generate equivalent atoms: #1 -x+1,-y+1,-z+2 #2 x,y-1,z #3 x,y+1,z

**Table S2** Selected bond lengths (Å) and bond angles (°) of compound **2**

|              |           |              |           |             |           |
|--------------|-----------|--------------|-----------|-------------|-----------|
| Mo(1)-O(28)  | 1.675(3)  | Mo(3)-O(25)  | 1.675(3)  | Mo(5)-O(17) | 1.673(3)  |
| Mo(1)-O(6)   | 1.943(3)  | Mo(3)-O(16)  | 1.929(3)  | Mo(5)-O(15) | 1.936(3)  |
| Mo(1)-O(2)   | 1.983(3)  | Mo(3)-O(1)   | 1.985(3)  | Mo(5)-O(5)  | 1.984(3)  |
| Mo(1)-O(18)  | 2.066(3)  | Mo(3)-O(9)#1 | 2.062(3)  | Mo(5)-O(21) | 2.049(3)  |
| Mo(1)-O(13)  | 2.094(3)  | Mo(3)-O(10)  | 2.113(3)  | Mo(5)-O(11) | 2.116(3)  |
| Mo(1)-O(3)   | 2.266(3)  | Mo(3)-O(8)   | 2.270(3)  | Mo(5)-O(4)  | 2.296(3)  |
| Mo(2)-O(26)  | 1.682(3)  | Mo(4)-O(27)  | 1.669(3)  | Mo(6)-O(20) | 1.672(3)  |
| Mo(2)-O(15)  | 1.927(3)  | Mo(4)-O(6)   | 1.940(3)  | Mo(6)-O(16) | 1.934(3)  |
| Mo(2)-O(5)   | 1.980(3)  | Mo(4)-O(2)   | 1.983(3)  | Mo(6)-O(1)  | 1.985(3)  |
| Mo(2)-O(14)# | 2.032(3)  | Mo(4)-O(12)  | 2.052(3)  | Mo(6)-O(22) | 2.066(3)  |
| Mo(2)-O(10)  | 2.103(3)  | Mo(4)-O(11)  | 2.094(3)  | Mo(6)-O(13) | 2.101(3)  |
| Mo(2)-O(8)   | 2.295(3)  | Mo(4)-O(4)   | 2.326(3)  | Mo(6)-O(3)  | 2.277(3)  |
| Mo(1)-Mo(4)  | 2.5958(5) | Mo(2)-Mo(5)  | 2.5770(5) | Mo(3)-Mo(6) | 2.5863(5) |
| Sr(1)-O(34)  | 2.506(4)  | Sr(1)-O(33)  | 2.574(4)  | Sr(1)-O(7)  | 2.674(3)  |

|                    |            |                     |            |                    |            |
|--------------------|------------|---------------------|------------|--------------------|------------|
| Sr(1)-O(19)        | 2.558(3)   | Sr(1)-O(6)          | 2.601(3)   |                    |            |
| Sr(1)-O(29)        | 2.559(4)   | Sr(1)-O(23)         | 2.624(3)   |                    |            |
| Cu(1)-O(5)#2       | 2.146(3)   | Cu(2)-O(7)#1        | 2.072(3)   | Cu(2)-O(24)        | 2.074(3)   |
| Cu(1)-O(5)         | 2.146(3)   | Cu(2)-O(7)          | 2.072(3)   | Cu(2)-O(19)#1      | 2.264(3)   |
| Cu(1)-O(1)         | 2.149(3)   | Cu(2)-O(24)#1       | 2.074(3)   | Cu(2)-O(19)        | 2.264(3)   |
| Cu(1)-O(1)#2       | 2.149(3)   | Cu(1)-O(2)          | 2.164(3)   | Cu(1)-O(2)#2       | 2.164(3)   |
| P(1)-O(7)          | 1.520(3)   | P(2)-O(29)          | 1.510(4)   | P(3)-O(19)         | 1.518(3)   |
| P(1)-O(8)          | 1.535(3)   | P(2)-O(21)          | 1.530(3)   | P(3)-O(14)         | 1.538(3)   |
| P(1)-O(4)          | 1.540(3)   | P(2)-O(12)          | 1.538(3)   | P(3)-O(9)          | 1.547(3)   |
| P(1)-O(3)          | 1.546(3)   | P(2)-O(30)          | 1.571(3)   | P(3)-O(23)         | 1.553(3)   |
| P(4)-O(31)         | 1.513(3)   | P(4)-O(22)          | 1.516(4)   |                    |            |
| P(4)-O(18)         | 1.523(4)   | P(4)-O(32)          | 1.593(4)   |                    |            |
| O(28)-Mo(1)-O(6)   | 106.93(15) | O(26)-Mo(2)-O(15)   | 105.74(15) | O(25)-Mo(3)-O(16)  | 105.68(16) |
| O(6)-Mo(1)-O(2)    | 94.85(13)  | O(26)-Mo(2)-O(5)    | 101.57(14) | O(25)-Mo(3)-O(1)   | 102.45(15) |
| O(6)-Mo(1)-O(18)   | 84.35(13)  | O(26)-Mo(2)-O(14)#1 | 97.39(15)  | O(25)-Mo(3)-O(9)#1 | 96.47(15)  |
| O(6)-Mo(1)-O(13)   | 154.27(13) | O(26)-Mo(2)-O(10)   | 98.33(14)  | O(25)-Mo(3)-O(10)  | 96.51(15)  |
| O(6)-Mo(1)-O(3)    | 82.99(12)  | O(26)-Mo(2)-O(8)    | 171.23(14) | O(25)-Mo(3)-O(8)   | 168.94(14) |
| O(27)-Mo(4)-O(6)   | 107.17(15) | O(17)-Mo(5)-O(15)   | 105.47(15) | O(20)-Mo(6)-O(16)  | 105.86(16) |
| O(27)-Mo(4)-O(2)   | 102.96(15) | O(17)-Mo(5)-O(5)    | 102.88(15) | O(20)-Mo(6)-O(1)   | 102.64(15) |
| O(27)-Mo(4)-O(12)  | 96.99(15)  | O(17)-Mo(5)-O(21)   | 97.05(15)  | O(20)-Mo(6)-O(22)  | 98.06(16)  |
| O(27)-Mo(4)-O(11)  | 98.46(15)  | O(17)-Mo(5)-O(11)   | 97.42(15)  | O(20)-Mo(6)-O(13)  | 99.07(15)  |
| O(27)-Mo(4)-O(4)   | 170.77(14) | O(17)-Mo(5)-O(4)    | 170.23(14) | O(20)-Mo(6)-O(3)   | 170.31(15) |
| O(34)-Sr(1)-O(19)  | 124.74(14) | O(34)-Sr(1)-O(29)   | 78.33(14)  | O(34)-Sr(1)-O(33)  | 75.50(17)  |
| O(34)-Sr(1)-O(6)   | 84.54(14)  | O(34)-Sr(1)-O(23)   | 77.02(14)  | O(34)-Sr(1)-O(7)   | 154.66(14) |
| O(5)-Cu(1)-O(1)    | 96.43(11)  | O(5)-Cu(1)-O(1)#2   | 83.57(11)  | O(5)-Cu(1)-O(2)    | 95.42(11)  |
| O(5)-Cu(1)-O(2)#2  | 84.58(11)  | O(7)-Cu(2)-O(24)#1  | 92.68(14)  | O(7)-Cu(2)-O(24)   | 87.33(14)  |
| O(7)-Cu(2)-O(19)#1 | 99.63(12)  | O(7)-Cu(2)-O(19)    | 89.20(13)  |                    |            |

Symmetry transformations used to generate equivalent atoms: #1 -x,-y,-z; #2 -x+1/2,-y+1/2,-z

**Table S3** Selected bond lengths (Å) and bond angles (°) of compound **3**

|                    |            |                    |            |                   |            |
|--------------------|------------|--------------------|------------|-------------------|------------|
| Mo(1)-O(4)         | 1.693(2)   | Mo(1)-O(15)        | 1.721(2)   | Mo(1)-O(10)#2     | 1.888(2)   |
| Mo(1)-O(1)         | 1.963(2)   | Mo(1)-O(2)#2       | 2.2890(18) | Mo(1)-O(8)        | 2.3287(19) |
| Mo(2)-O(22)        | 1.690(2)   | Mo(2)-O(17)        | 1.730(2)   | Mo(2)-O(10)       | 1.916(2)   |
| Mo(2)-O(14)        | 1.933(2)   | Mo(2)-O(7)         | 2.2400(18) | Mo(2)-O(16)#3     | 2.4477(19) |
| Mo(3)-O(21)        | 1.704(2)   | Mo(3)-O(19)        | 1.741(2)   | Mo(3)-O(1)        | 1.878(2)   |
| Mo(3)-O(6)#2       | 1.967(2)   | Mo(3)-O(2)#2       | 2.2169(18) | Mo(3)-O(11)       | 2.2988(19) |
| Mo(4)-O(20)        | 1.708(2)   | Mo(4)-O(13)        | 1.734(2)   | Mo(4)-O(12)       | 1.895(2)   |
| Mo(4)-O(6)         | 1.922(2)   | Mo(4)-O(11)#3      | 2.2547(19) | Mo(4)-O(3)        | 2.3535(19) |
| Mo(5)-O(23)        | 1.707(2)   | Mo(5)-O(9)         | 1.718(2)   | Mo(5)-O(14)       | 1.927(2)   |
| Mo(5)-O(12)        | 1.951(2)   | Mo(5)-O(16)#3      | 2.202(2)   | Mo(5)-O(3)        | 2.335(2)   |
| Sr(1)-O(5)         | 2.5541(19) | Sr(1)-O(15)        | 2.556(2)   | Sr(1)-O(8)        | 2.5816(19) |
| Sr(1)-O(26)        | 2.589(3)   | Sr(1)-O(25)        | 2.593(3)   | Sr(1)-O(13)       | 2.615(2)   |
| Sr(1)-O(24)        | 2.626(3)   | Sr(1)-O(6)         | 2.833(2)   | Sr(1)-O(3)        | 3.191(2)   |
| Cu(1)-O(5)#2       | 2.146(3)   | Cu(2)-O(7)#1       | 2.072(3)   | Cu(2)-O(24)       | 2.074(3)   |
| Cu(1)-O(5)         | 2.146(3)   | Cu(2)-O(7)         | 2.072(3)   | Cu(2)-O(19)#1     | 2.264(3)   |
| Cu(1)-O(1)         | 2.149(3)   | Cu(2)-O(24)#1      | 2.074(3)   | Cu(2)-O(19)       | 2.264(3)   |
| Cu(1)-O(1)#2       | 2.149(3)   | Cu(1)-O(2)         | 2.164(3)   | Cu(1)-O(2)#2      | 2.164(3)   |
| P(1)-O(5)          | 1.5172(19) | P(1)-O(7)          | 1.530(2)   | P(1)-O(3)         | 1.549(2)   |
| P(1)-O(2)          | 1.557(2)   | P(2)-O(8)          | 1.516(2)   | P(2)-O(18)        | 1.528(2)   |
| P(2)-O(16)         | 1.555(2)   | P(2)-O(11)         | 1.5581(19) |                   |            |
| O(4)-Mo(1)-O(15)   | 103.25(10) | O(4)-Mo(1)-O(10)#2 | 101.23(10) | O(4)-Mo(1)-O(1)   | 100.25(9)  |
| O(4)-Mo(1)-O(2)#2  | 86.80(9)   | O(4)-Mo(1)-O(8)    | 172.86(9)  | O(22)-Mo(2)-O(17) | 102.03(11) |
| O(22)-Mo(2)-O(10)  | 103.56(10) | O(22)-Mo(2)-O(14)  | 102.06(10) | O(22)-Mo(2)-O(7)  | 88.06(9)   |
| O(22)-Mo(2)-O(16)# | 169.88(9)  | O(21)-Mo(3)-O(19)  | 104.45(10) | O(21)-Mo(3)-O(1)  | 100.17(10) |
| O(21)-Mo(3)-O(6)#2 | 99.17(10)  | O(21)-Mo(3)-O(2)#2 | 159.98(9)  | O(21)-Mo(3)-O(11) | 87.58(9)   |
| O(20)-Mo(4)-O(13)  | 103.79(11) | O(20)-Mo(4)-O(12)  | 100.46(10) | O(20)-Mo(4)-O(6)  | 104.11(10) |

|                    |            |                   |            |                     |            |
|--------------------|------------|-------------------|------------|---------------------|------------|
| O(20)-Mo(4)-O(11)# | 91.29(9)   | O(20)-Mo(4)-O(3)  | 169.81(9)  | O(23)-Mo(5)-O(9)    | 104.07(12) |
| O(23)-Mo(5)-O(14)  | 99.23(10)  | O(23)-Mo(5)-O(12) | 95.08(10)  | O(23)-Mo(5)-O(16)#3 | 98.20(10)  |
| O(23)-Mo(5)-O(3)   | 166.01(10) | O(14)-Mo(5)-O(3)  | 89.68(8)   | O(12)-Mo(5)-O(3)    | 72.68(7)   |
| O(5)-Sr(1)-O(15)   | 78.57(6)   | O(5)-Sr(1)-O(8)   | 128.09(6)  | O(5)-Sr(1)-O(26)    | 149.49(9)  |
| O(5)-Sr(1)-O(25)   | 77.99(8)   | O(5)-Sr(1)-O(13)  | 106.89(6)  | O(5)-Sr(1)-O(24)    | 74.53(7)   |
| O(5)-Sr(1)-O(6)    | 73.62(6)   | O(5)-Sr(1)-O(3)   | 50.39(5)   | O(15)-Sr(1)-O(3)    | 123.67(6)  |
| O(5)-P(1)-O(7)     | 110.66(11) | O(5)-P(1)-O(3)    | 110.08(11) | O(5)-P(1)-O(2)      | 109.91(11) |
| O(8)-P(2)-O(18)    | 111.60(11) | O(8)-P(2)-O(16)   | 107.49(11) | O(8)-P(2)-O(11)     | 109.88(11) |

Symmetry transformations used to generate equivalent atoms: #1 -x,-y,-z; #2 -x+1/2,-y+1/2,-z

**Table S4 Hydrogen Bond Lengths (Å) and Bond Angles (°) of compound 1**

| D-H...A                   | d(D-H) | d(H...A) | d(D...A)  | ∠DHA  | Symmetry         |
|---------------------------|--------|----------|-----------|-------|------------------|
| N10- H10... <u>O45</u>    | 0.86   | 2.30     | 3.06(2)   | 148.7 | —                |
| O1W-H1WA... <u>O3W</u>    | 0.85   | 2.20     | 2.97(2)   | 150.7 | —                |
| O3W- H3WA ... <u>O4W</u>  | 0.85   | 2.30     | 2.88(2)   | 126.5 | —                |
| O6W- H6WA... <u>O66</u>   | 0.85   | 1.73     | 2.278(9)  | 120.3 | —                |
| O4W- H4WA... <u>O5W</u>   | 0.85   | 2.22     | 2.713(16) | 116.8 | —                |
| N1- H1A... <u>O55</u>     | 0.86   | 2.51     | 3.12(2)   | 128.4 | —                |
| N8- H8... <u>O57</u>      | 0.86   | 2.11     | 2.93(2)   | 160.3 | -x, -y+1, -z+1   |
| N8- H8 ... <u>O40</u>     | 0.86   | 2.58     | 3.20(2)   | 129.8 | -x, -y+1, -z+1   |
| O8W - H8WA ... <u>O77</u> | 0.85   | 2.54     | 3.29(3)   | 146.7 | x, y, z-1        |
| O8W - H8WA ... <u>O49</u> | 0.85   | 2.61     | 3.10(2)   | 118.3 | x, y, z-1        |
| O8W - H8WB ... <u>O2W</u> | 0.85   | 2.09     | 2.93(3)   | 173.6 | x-1, y, z-1      |
| O7W - H7WA ... <u>O76</u> | 0.85   | 2.22     | 2.78(2)   | 123.4 | x, y, z-1        |
| O7W - H7WB ... <u>O77</u> | 0.85   | 2.12     | 2.87(2)   | 146.9 | x, y, z-1        |
| O1W-H1WB... <u>O72</u>    | 0.85   | 2.62     | 3.102(17) | 116.9 | -x+1, -y+1, -z+2 |
| O3W-H3WB... <u>O71</u>    | 0.85   | 2.14     | 2.599(17) | 113.7 | x+1, y, z        |
| O2W - H2WA ... <u>O71</u> | 0.85   | 2.17     | 2.825(17) | 133.9 | x+1, y, z        |
| O2W-H2WB... <u>O8W</u>    | 0.85   | 2.36     | 2.93(3)   | 125.7 | x+1, y, z+1      |
| O6W-H6WB... <u>O76</u>    | 0.85   | 1.81     | 2.388(12) | 124.1 | -x+1, -y+1, -z+2 |
| O4W-H4WB... <u>O62</u>    | 0.85   | 2.22     | 3.017(15) | 156.6 | x+1, y, z        |
| O5W-H5WA... <u>N7</u>     | 0.85   | 2.61     | 3.25(3)   | 133.5 | -x+1, -y+1, -z+1 |
| O76-H76A... <u>O72</u>    | 0.85   | 2.73     | 3.242(15) | 120.4 | -x+1, -y+1, -z+2 |
| N6-H6... <u>O62</u>       | 0.85   | 2.61     | 3.107(18) | 118.3 | x+1, y+1, z      |
| N4-H4A... <u>O28</u>      | 0.85   | 2.62     | 3.28(3)   | 134.2 | x+1, y, z        |

**Table S5 Hydrogen Bond Lengths (Å) and Bond Angles (°) of compound 2**

| D-H...A                   | d(D-H) | d(H...A) | d(D...A) | ∠DHA  | Symmetry         |
|---------------------------|--------|----------|----------|-------|------------------|
| O2W - H2WB ... <u>O16</u> | 0.85   | 1.98     | 2.802(8) | 161.4 | x+1, y+1, z+1    |
| O31 - H31 ... <u>O31</u>  | 0.82   | 1.71     | 2.455(7) | 149.6 | -x, -y-1, -z     |
| O30 - H30 ... <u>O1W</u>  | 0.82   | 1.84     | 2.658(6) | 176.3 | -x+1, -y+1, -z+1 |
| O33 - H33A ... <u>O27</u> | 0.85   | 2.18     | 2.979(6) | 156.2 | -x+1, -y, -z+1   |
| O33 - H33B ... <u>O25</u> | 0.85   | 2.57     | 3.018(5) | 114.2 | x+1, y, z        |
| O34 - H34A ... <u>O28</u> | 0.85   | 2.22     | 2.969(6) | 146.9 | -x+1, -y, -z+1   |
| O34 - H34B ... <u>O26</u> | 0.85   | 2.50     | 2.933(5) | 112.8 | x+1, y, z        |
| O34 - H34B ... <u>O14</u> | 0.85   | 2.59     | 3.403(6) | 161.2 | -x+1, -y, -z     |
| O1W - H1WB ... <u>O11</u> | 0.85   | 2.05     | 2.822(5) | 151.7 | —                |
| O1W - H1WA ... <u>O2W</u> | 0.85   | 2.26     | 2.851(9) | 126.7 | —                |
| O32 - H32 ... <u>O3</u>   | 0.82   | 2.42     | 2.930(5) | 121.6 | —                |

| O32- H32... <u>O7</u>                                                | 0.82   | 2.10     | 2.786(5) | 141.7 | —           |
|----------------------------------------------------------------------|--------|----------|----------|-------|-------------|
| O24- H24A... <u>O29</u>                                              | 0.85   | 2.00     | 2.817(5) | 160.8 | —           |
| Table S6 Hydrogen Bond Lengths (Å) and Bond Angles (°) of compound 3 |        |          |          |       |             |
| D-H...A                                                              | d(D-H) | d(H...A) | d(D...A) | ∠DHA  | Symmetry    |
| O24- H24B ... <u>O9</u>                                              | 0.85   | 2.14     | 2.984(3) | 169.9 | —           |
| O26 - H26A ... <u>O1</u>                                             | 0.82   | 2.65     | 3.257(4) | 129.7 | —           |
| O1W - H1WA ... <u>O21</u>                                            | 0.82   | 2.40     | 2.968(5) | 124.7 | —           |
| O24 - H24A... <u>O17</u>                                             | 0.85   | 2.22     | 3.020(3) | 157.5 | x+1, y, z   |
| O2W - H2WA ... <u>O18</u>                                            | 0.85   | 2.32     | 2.952(3) | 131.8 | x-1, y, z-1 |
| O2W - H2WA ... <u>O16</u>                                            | 0.85   | 2.37     | 3.109(3) | 146.4 | x-1, y, z-1 |
| O2W - H2WB... <u>N5</u>                                              | 0.85   | 1.97     | 2.749(4) | 151.1 | x-1, y, z   |
| O2W - H2WB ... <u>O21</u>                                            | 0.85   | 2.54     | 2.947(3) | 110.2 | x-1, y, z   |
| O25 - H25A ... <u>O14</u>                                            | 0.85   | 2.39     | 2.887(3) | 117.8 | x, y, z-1   |
| O25 - H25B ... <u>O19</u>                                            | 0.85   | 2.09     | 2.842(4) | 147.5 | x-1, y, z   |

Table S7 Bond valence sum calculations for Mo atoms in **1**<sup>[1]</sup>

|      | Mo <sup>V</sup> | Mo <sup>VI</sup> | Average     |
|------|-----------------|------------------|-------------|
| Mo1  | 5.75            | 6.02             | 5.89        |
| Mo2  | 5.54            | 5.80             | 5.67        |
| Mo3  | 5.58            | 5.84             | 5.71        |
| Mo4  | 5.74            | 6.01             | 5.88        |
| Mo5  | 5.52            | 5.77             | 5.65        |
| Mo6  | 5.78            | 6.05             | 5.92        |
| Mo7  | 5.79            | 6.06             | 5.93        |
| Mo8  | 5.66            | 5.93             | 5.80        |
| Mo9  | 5.80            | 6.07             | 5.94        |
| Mo10 | 5.83            | 6.11             | 5.97        |
| Mo11 | 5.47            | 5.73             | 5.60        |
| Mo12 | 5.57            | 5.83             | 5.70        |
| Mo13 | 5.63            | 5.89             | 5.76        |
| Mo14 | 5.67            | 5.93             | 5.80        |
| Mo15 | 5.63            | 5.90             | 5.77        |
| Mo16 | 5.61            | 5.87             | 5.74        |
| Mo17 | 5.78            | 6.05             | 5.92        |
| Mo18 | 5.65            | 5.91             | 5.78        |
| Sum  | 5.67            | 5.93             | <b>5.80</b> |

[1] ref: I. D. Brown, D. Altermatt, *Acta Crystallogr.*, 1985, **B41**, 244–247.

### 3. Physical characterization

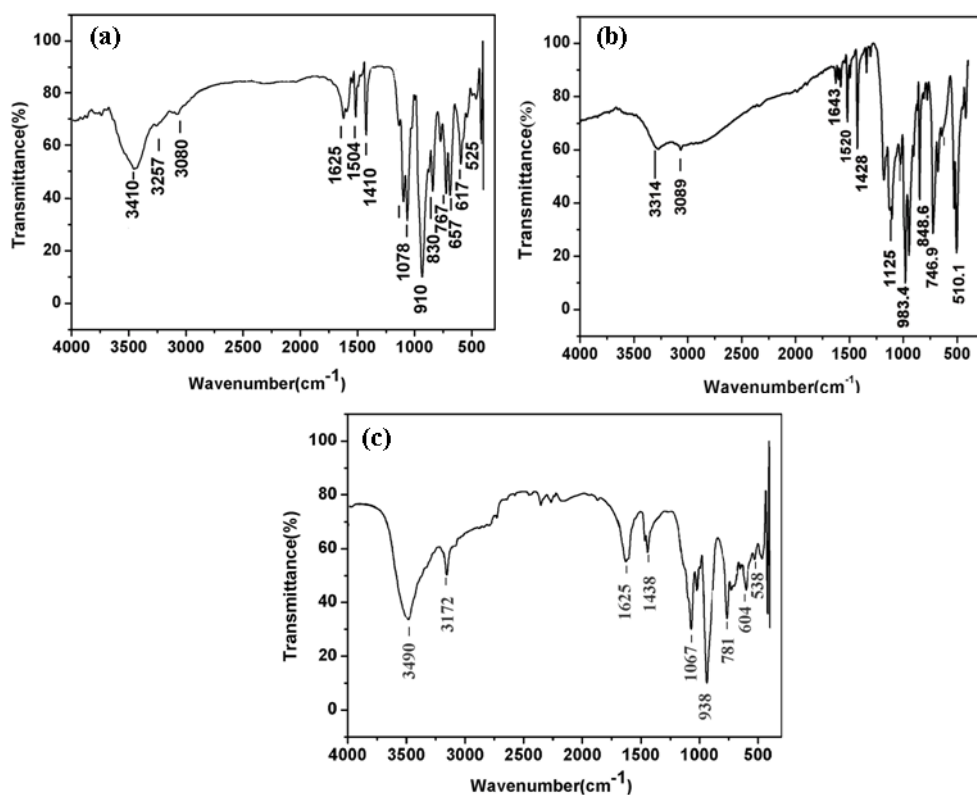

**Fig. S6** IR spectra of (a) compound 1, (b) compound 2 and (c) compound (3).

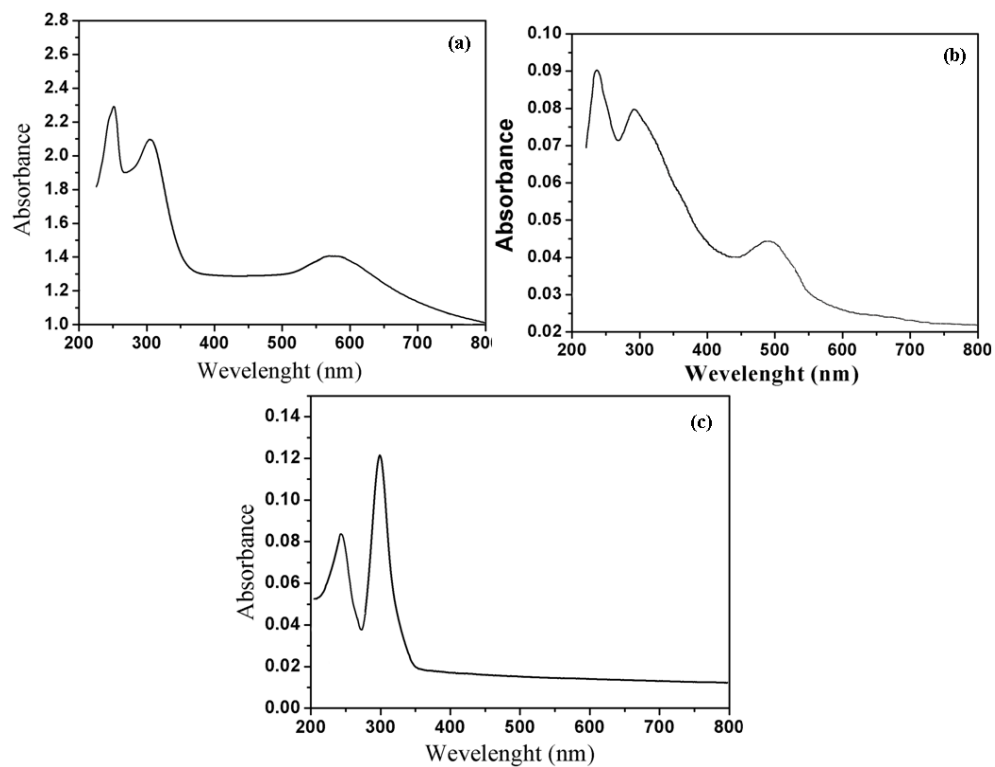

**Fig. S7** Solid state UV-vis spectra of (a) compound 1, (b) compound 2 and (c) compound 3.



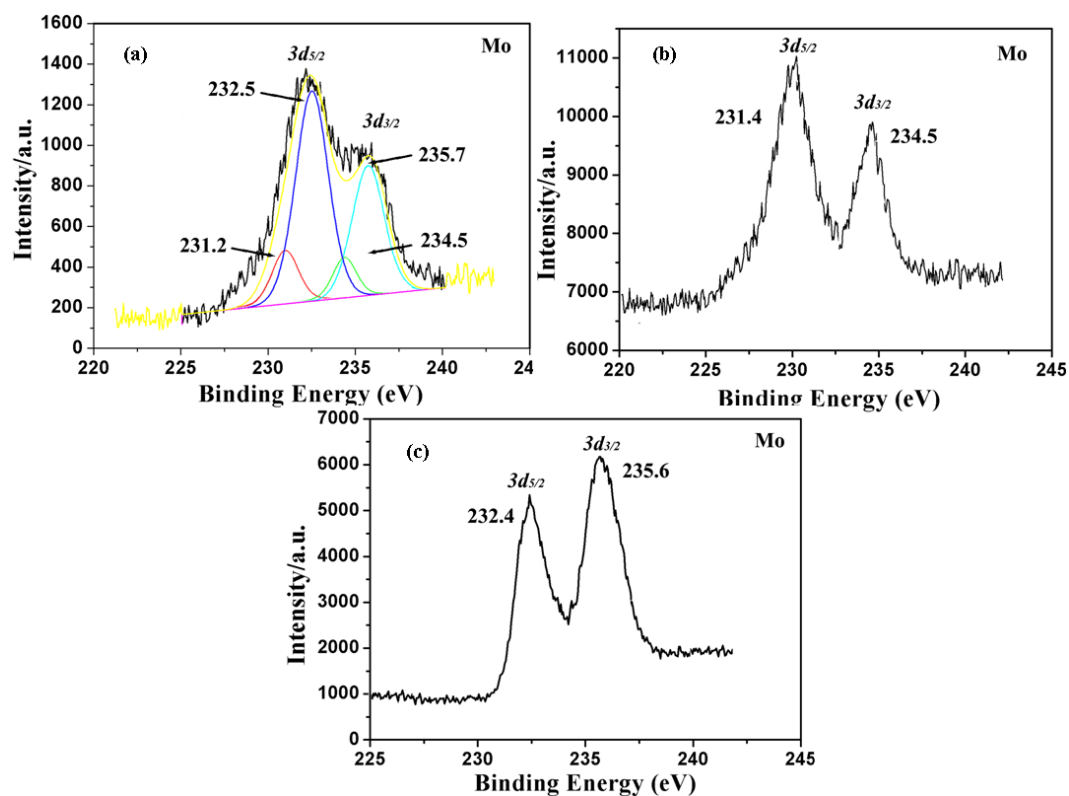

Fig. S8 The XPS spectrum of (a) compound 1, (b) compound 2 and (c) compound 3.

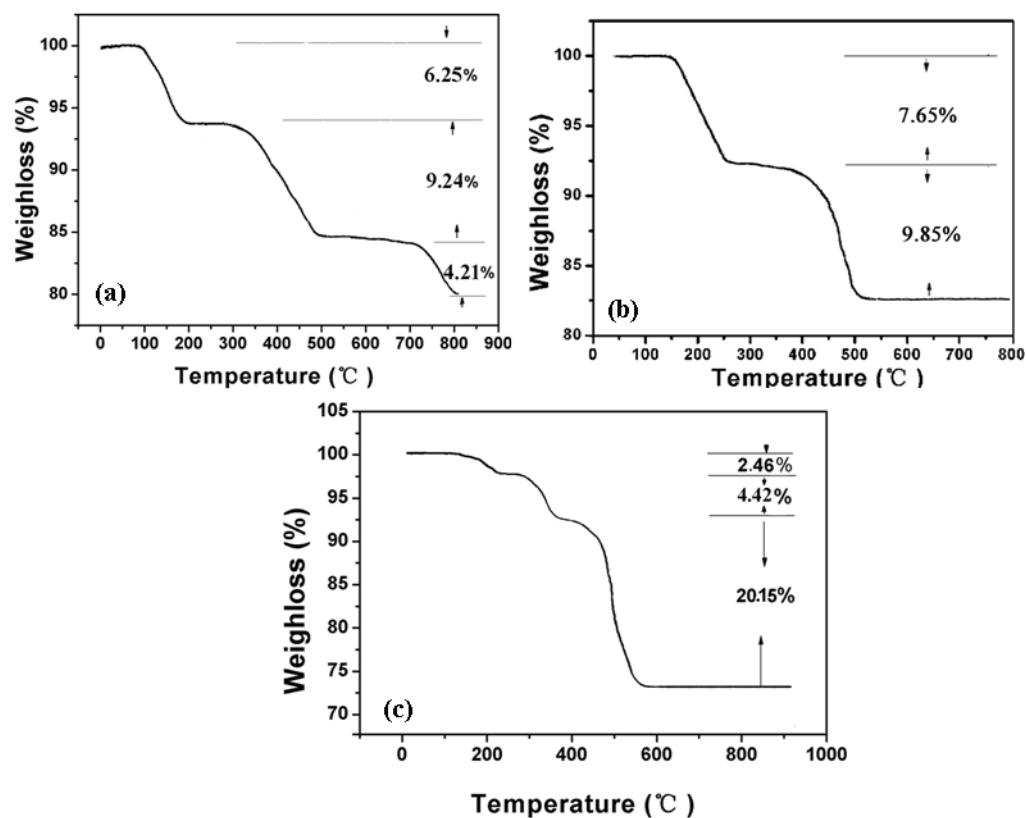

Fig. S9 TG of (a) compound 1, (b) compound 2 and (c) compound 3.

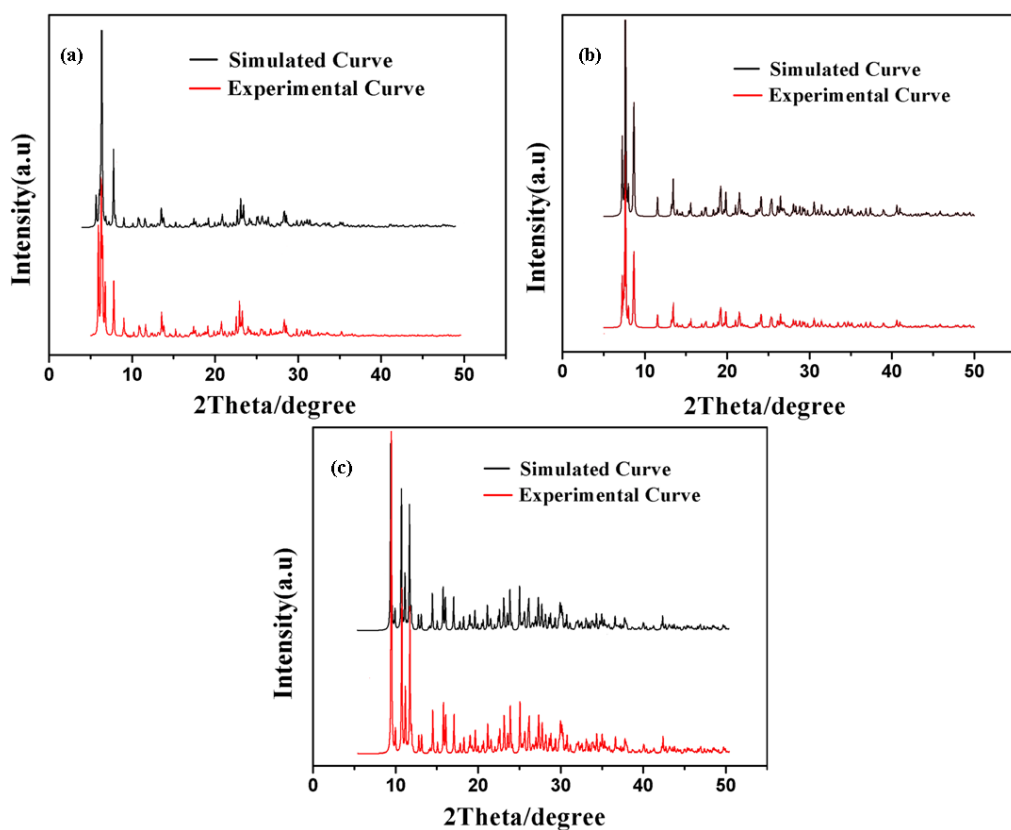

**Figure S10.** The XPRD contrast curves of (a) compound 1, (b) compound 2 and (c) compound 3.

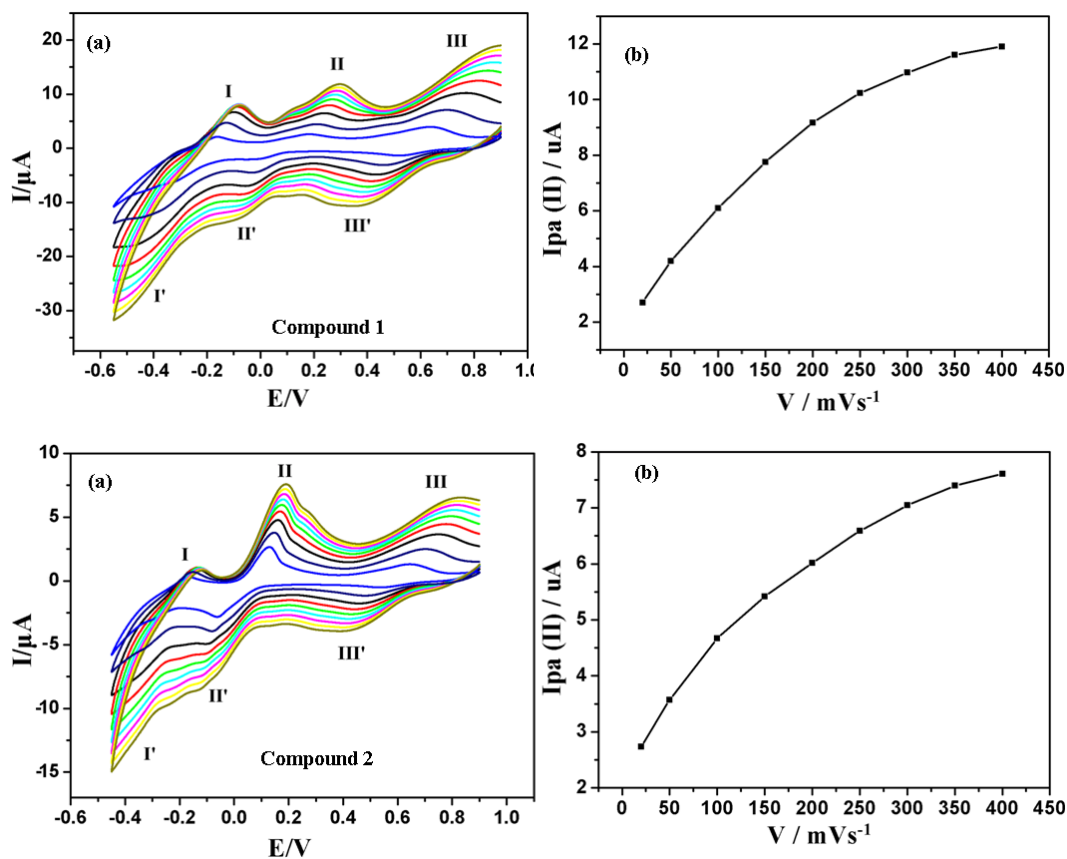

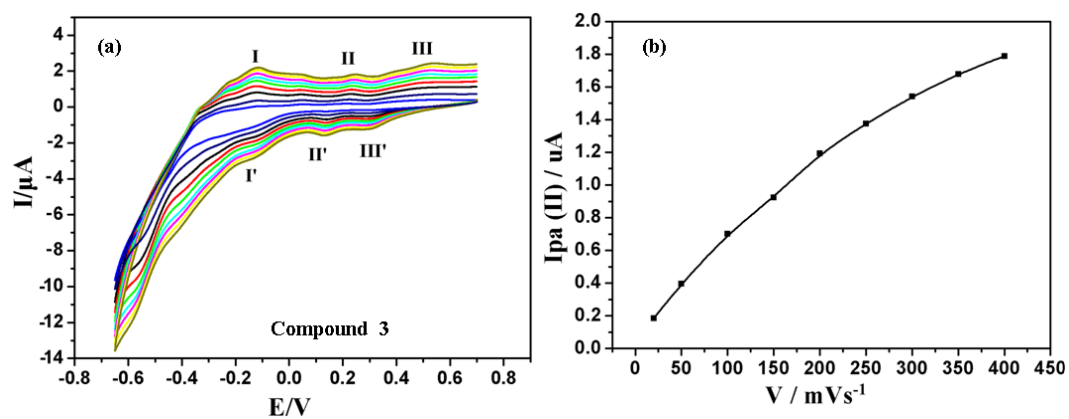

**Fig. S11** (a) Cyclic voltammograms of **1-CPE**, **2-CPE**, and **3-CPE** in the 1.0 M H<sub>2</sub>SO<sub>4</sub> solution at different scan rates (from inner to outer: 20, 50, 100, 150, 200, 250, 300, 350, 400 mV s<sup>-1</sup>). (b) The dependence of anodic peak II current on scan rates.
